# Supplementary material for: A cell-type-specific alternative splicing regulator shapes synapse properties in a trans-synaptic manner
Source: PubMed Central journal article supplement (PMC10066595; doi:10.1016/j.celrep.2023.112173), 2023-03-01
Supplement: mmc1.pdf [file mmc1.pdf]

**Cell Reports, Volume 42**

**Supplemental information**

**A cell-type-specific alternative splicing  
regulator shapes synapse properties  
in a *trans*-synaptic manner**

**Lisa Traunmüller, Jan Schulz, Raul Ortiz, Huijuan Feng, Elisabetta Furlanis, Andrea M. Gomez, Dietmar Schreiner, Josef Bischofberger, Chaolin Zhang, and Peter Scheiffele**

## **Supplementary Material**

Figure S1 – related to Figure 1

Figure S2 – related to Figure 2

Figure S3 – related to Figure 3

Figure S4 – related to Figure 4

Figure S5 – related to Figure 4

Figure S6 - related to Figure 4

Figure S1

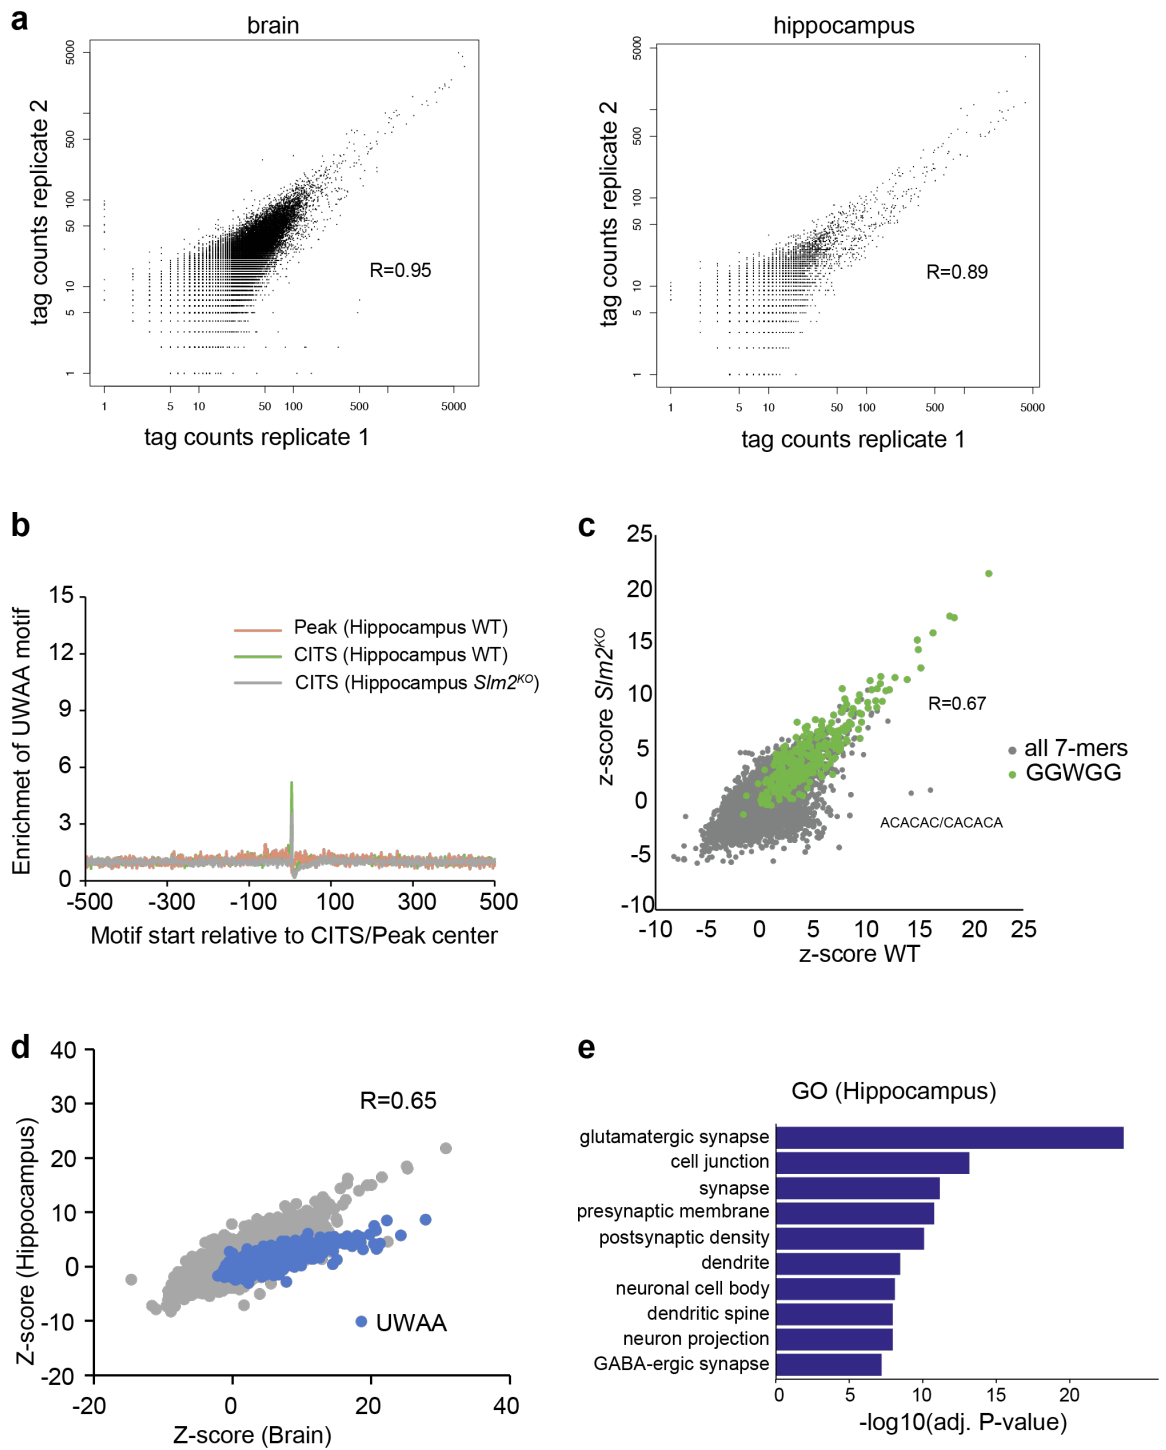

### Figure S1. Mapping SLM2 binding sites by eCLIP

**a**, Correlation plot of tag numbers over called eCLIP tag clusters in replicate 1 (x-axis) and replicate 2 (y-axis) of whole brain (left panel) and hippocampus (right panel) eCLIP data. Pearson's correlation coefficient is shown. **b**, Enrichment of UWAA around CITS is calculated from the frequency of UWAA starting at each position relative to the inferred crosslink sites, normalized by the frequency of the element in flanking sequences in hippocampus eCLIP data from wild-type and *Slm2*<sup>KO</sup> hippocampus. Enrichment of UWAA around the CLIP tag cluster peak center is shown for comparison. **c**, Correlation plot of 7mer enrichment z-scores from WT and *Slm2*<sup>KO</sup> hippocampal eCLIP data. The GGWGG motif identified in hippocampal WT eCLIP samples (highlighted in green) is found to the similar extent in global SLM2 knock-out control samples. Pearson's correlation coefficient is shown. **d**, Correlation of 7-mer enrichment z-scores of 100nt region around peak center from whole brain (x-axis) and hippocampus (y-axis) eCLIP data. 7-mers including UWAA are highlighted in blue. Pearson's correlation coefficient is shown. **e**, Gene Ontology analysis (DAVID tools) of genes with SLM2 binding sites in hippocampal eCLIP data identified by CLIPper/IDR. Top 10 enriched gene ontology categories for cellular compartment are displayed.

Figure S2

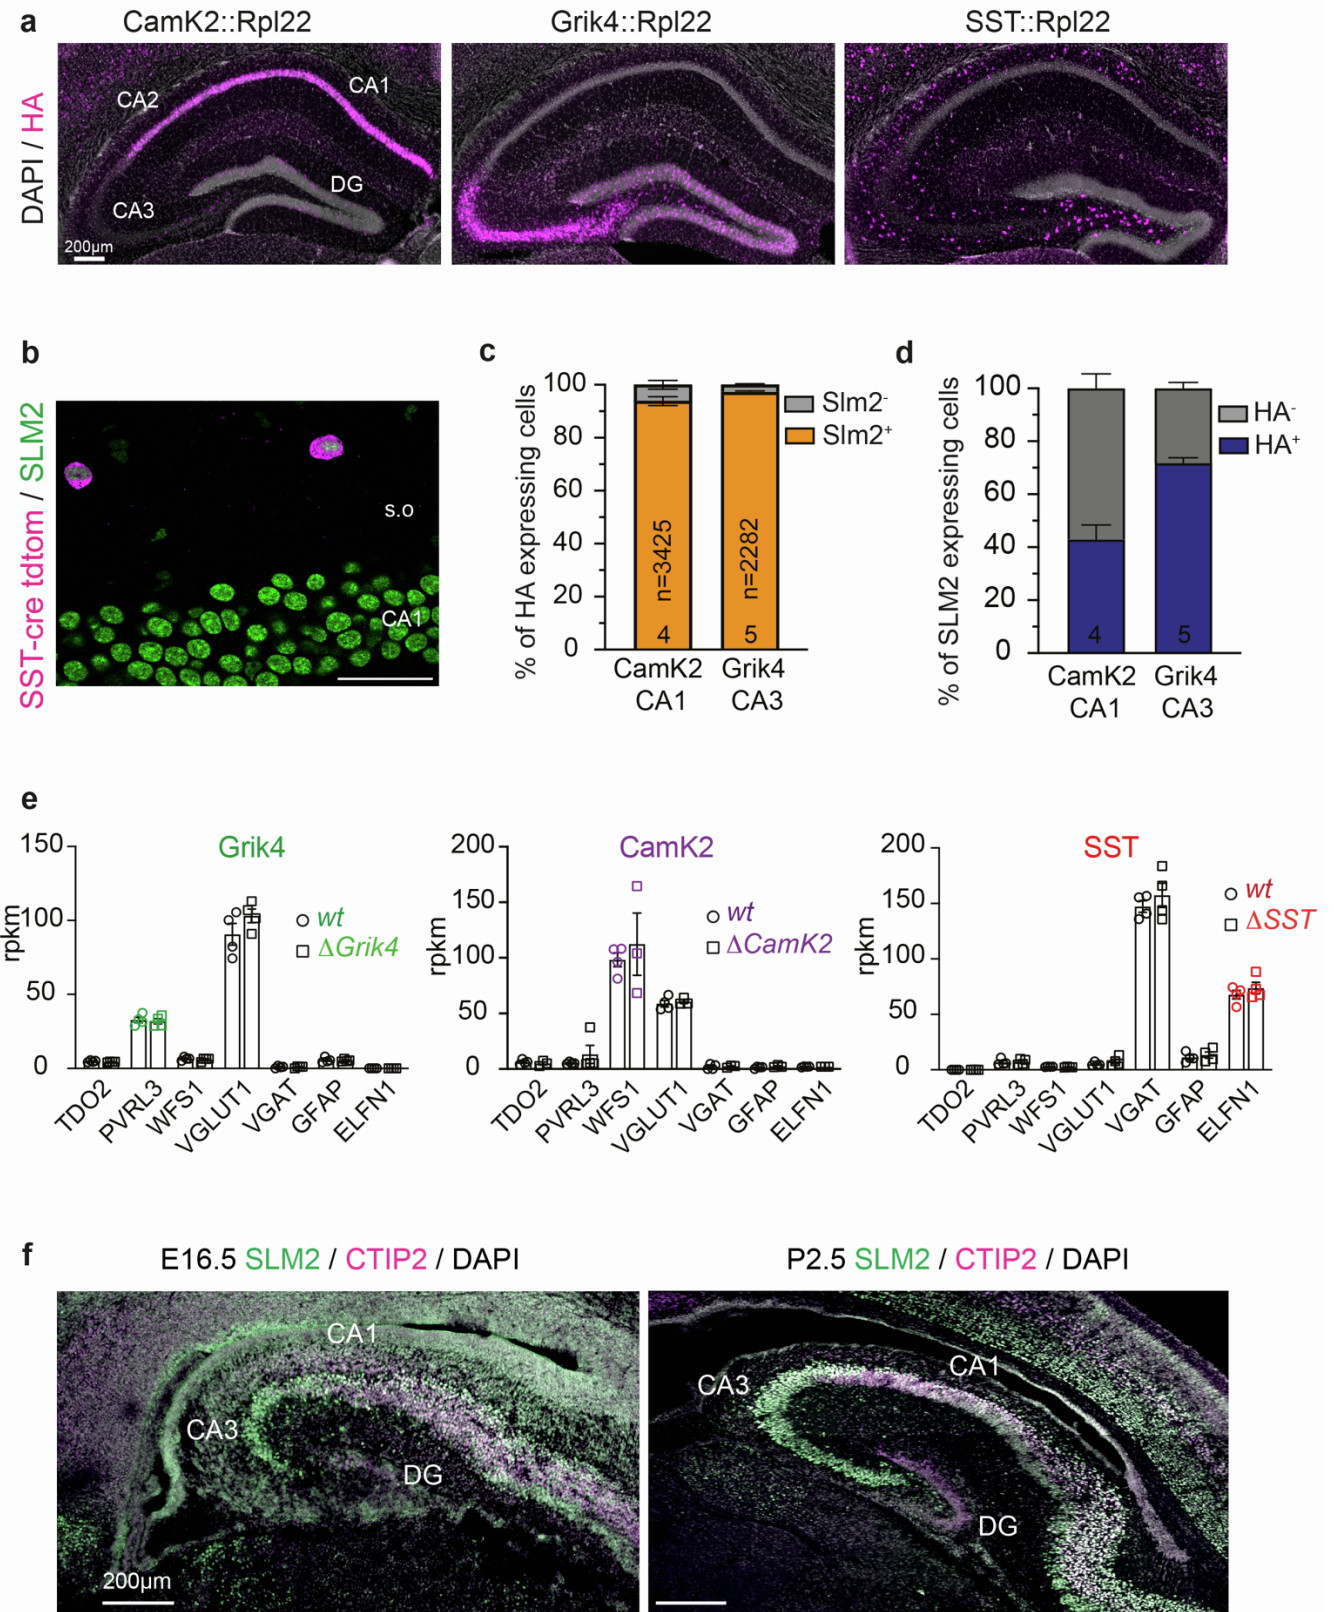

**Figure S2. Expression and conditional knock-out of SLM2 in the mouse hippocampus.**

**a**, Representative images of cre-dependent expression of HA-tagged ribosomal protein L2 (Rpl22) in CA1 (CamK2::Rpl22), CA3 (Grik4::Rpl22) or SST+ interneurons (SST::Rpl22). Scale bar 200 $\mu$ m, DAPI (grey), HA (magenta). **b**, SLM2 (green) expression in CA1 pyramidal neurons and genetically marked SST+ interneurons (magenta) in the stratum oriens (s.o). Scale bar 40 $\mu$ m. **c**, Quantification of percentages of HA+ neurons defined by either CamK2 or Grik4 cre-recombinase which express SLM2 (SLM2+, orange). CamK2-cre: N=4 animals, n=3425 cells. Grik4-cre: N=5 animals, n=2282 cells. Mean of each replicate  $\pm$  SEM. **d**, Quantification of SLM2+ neurons in either CA1 or CA3 layers which express Rpl22-HA (HA+, blue). Same images and numbers as for (c). Mean of each replicate  $\pm$  SEM. **e**, Reads per kilobase million (rpkm) of cell class-specific marker genes in all analyzed cell types and individual replicates of *wt* and  $\Delta$ SLM2 animals (N=4). *TDO2*: DG marker, *PVRL3*: CA3, *RGS12*: CA2, *WFS1*: CA1, *VGLUT1*: excitatory neurons, *VGAT*: inhibitory neurons, *GFAP*: glia, *ELFN1*: SST neurons. **f**, Hippocampal tissue from mice immunostained for SLM2 (green), CTIP2 (purple) and DAPI (grey) at E16.5 and P2.5. This demonstrates selective expression of SLM2 in CA1 and CA3 but not dentate granule cells at early stages of hippocampal development. Scale bar is 200 $\mu$ m.

Figure S3

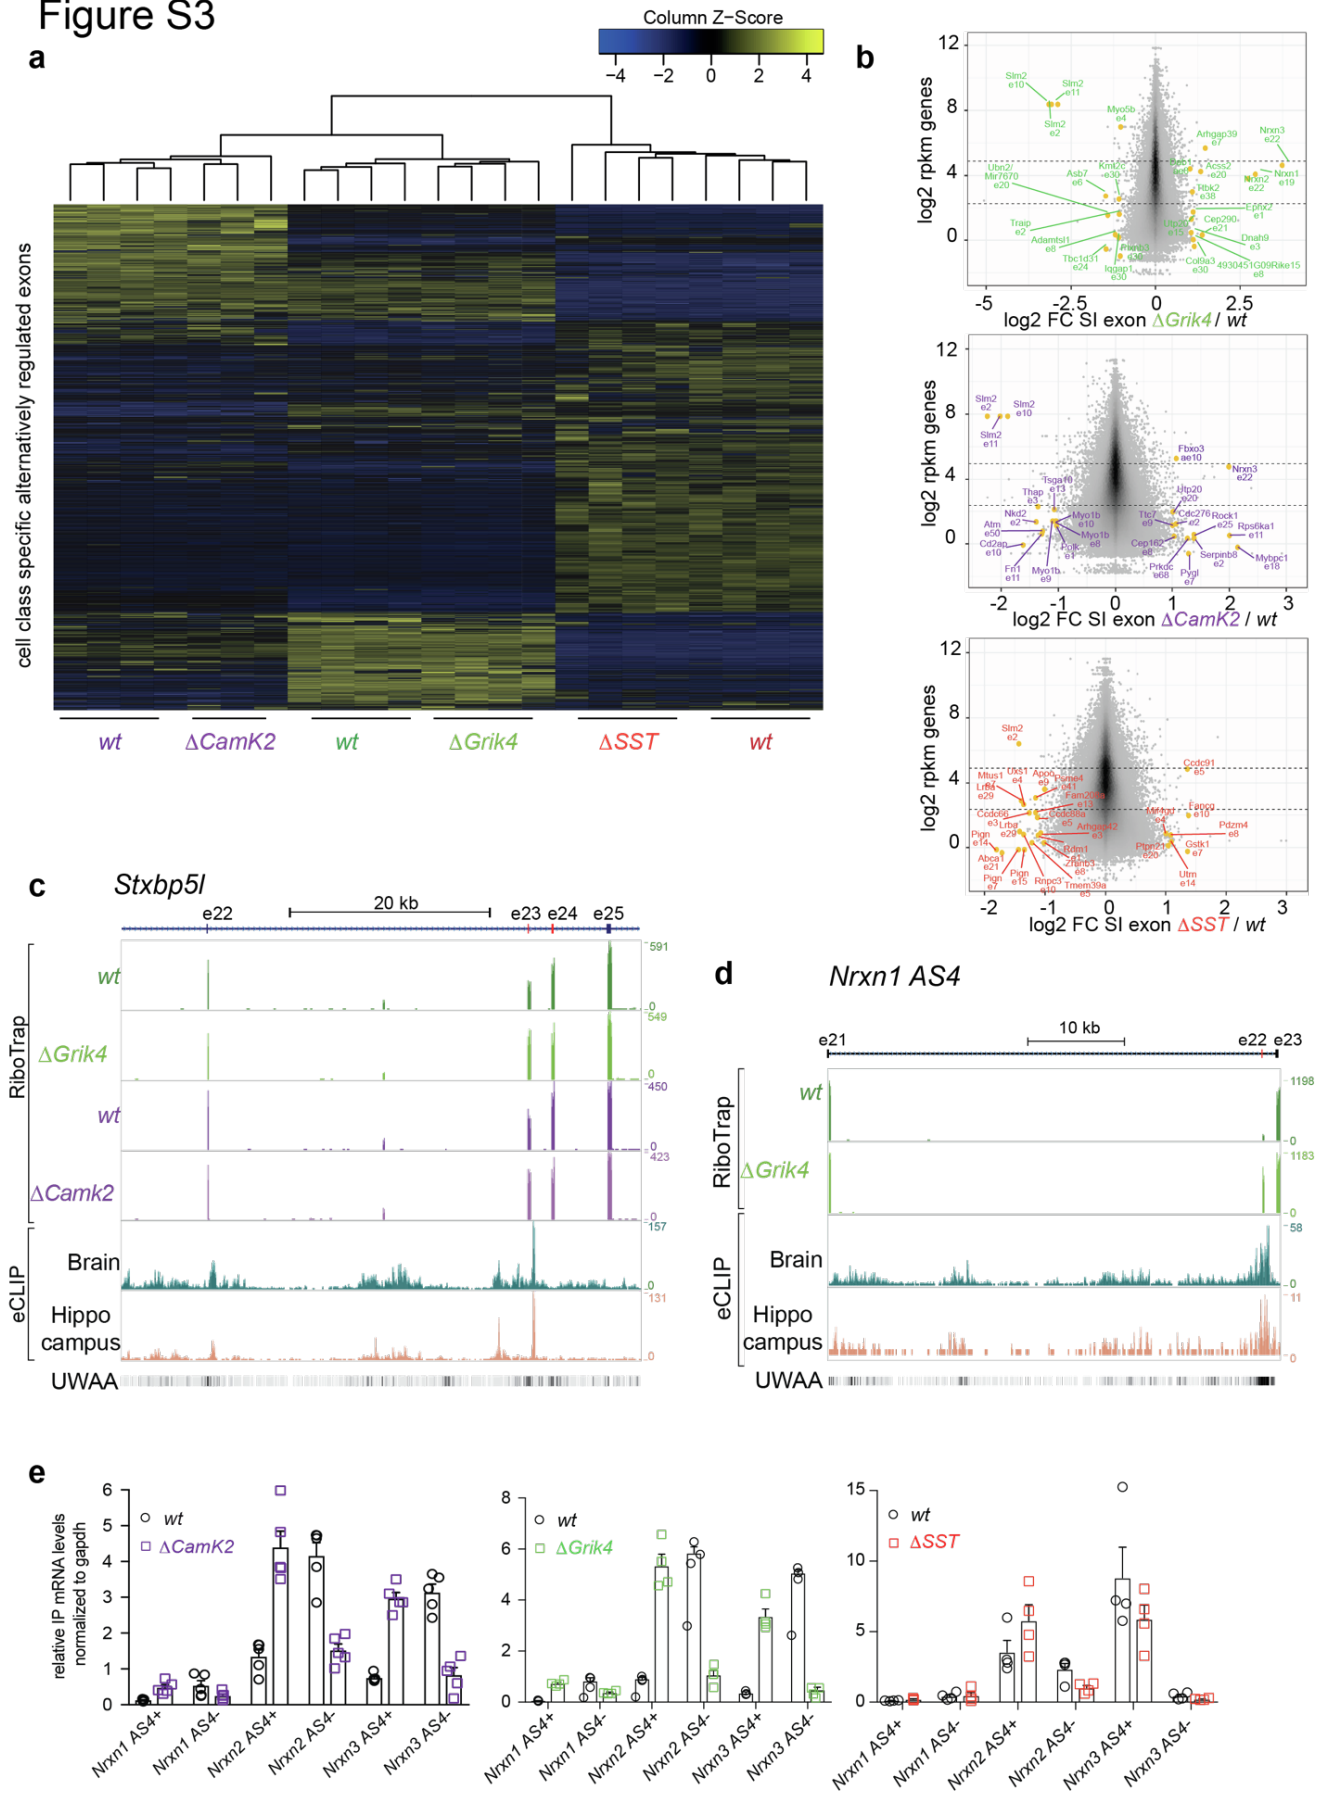

**Figure S3. Alternative splicing in *Slm2* conditional knock-out cells.**

**a**, Heatmap of splicing indices (SI) of exons across individual replicates of *wt* and *Slm2* conditional mutants. Analyzed exons were defined by previously identified, cell class-specific alternative exons<sup>1</sup>. Splicing indices were normalized by row and column. Detailed z-score values, gene and exon names are provided in Table S2. **b**, Log2 fold change SI (splicing index) and p-values for all detected exons (grey). Exons which are significantly differentially regulated by SLM2 in each cell class (called by exon analysis) are marked in yellow. **b**, Log2 fold change of SI of all detected exons (grey) and log2 rpkkm values of the corresponding gene. Differentially regulated exons called by the exon analysis are marked in yellow. Gene names and exons involved in the splicing regulation are indicated in purple for differential changes in *CamK2*, green for *Grik4* and red for *SST*. **c,d**, Integration of RiboTrap and eCLIP analysis for significantly de-regulated exons of *Stxbp5l* (c) and *Nrxn1* (d). SLM2 binding sites in the downstream introns and enrichment of the UWAA binding motif of the *Grik4* comparison are illustrated. **e**, Quantitative PCR for alterations in *Nrxn* splicing at the alternatively spliced segment 4 (AS4). Relative *Gapdh* normalized mRNA levels of RiboTRAP IP samples in WT and  $\Delta$ SLM2 samples. For all PCRs: *wt CamK2* and  $\Delta$ *CamK2*: N=5; *wt Grik4* N=4 and  $\Delta$ *Grik4* N=5, *wt SST* N=4 and  $\Delta$ *SST* N=4, except for *Nrxn1*<sup>AS4+</sup> N=3. *wt CamK2* vs  $\Delta$ *CamK2*: *Nrxn1*<sup>AS4-</sup> p= 0.861, *Nrxn1*<sup>AS4+</sup> p=0.0019, *Nrxn2*<sup>AS4-</sup> p=0.0002, *Nrxn2*<sup>AS4+</sup> p=0.0003, *Nrxn3*<sup>AS4-</sup> p<0.0001, *Nrxn3*<sup>AS4+</sup> p<0.0001; *wt Grik4* vs  $\Delta$ *Grik4* *Nrxn1*<sup>AS4-</sup> p=0.0035, *Nrxn1*<sup>AS4+</sup> p<0.0001, *Nrxn2*<sup>AS4-</sup> p<0.0001, *Nrxn2*<sup>AS4+</sup> p<0.0001, *Nrxn3*<sup>AS4-</sup> p<0.0001, *Nrxn3*<sup>AS4+</sup> p<0.0001, *wt SST* vs  $\Delta$ *SST* *Nrxn2*<sup>AS4-</sup> p=0.0251.



Figure S4

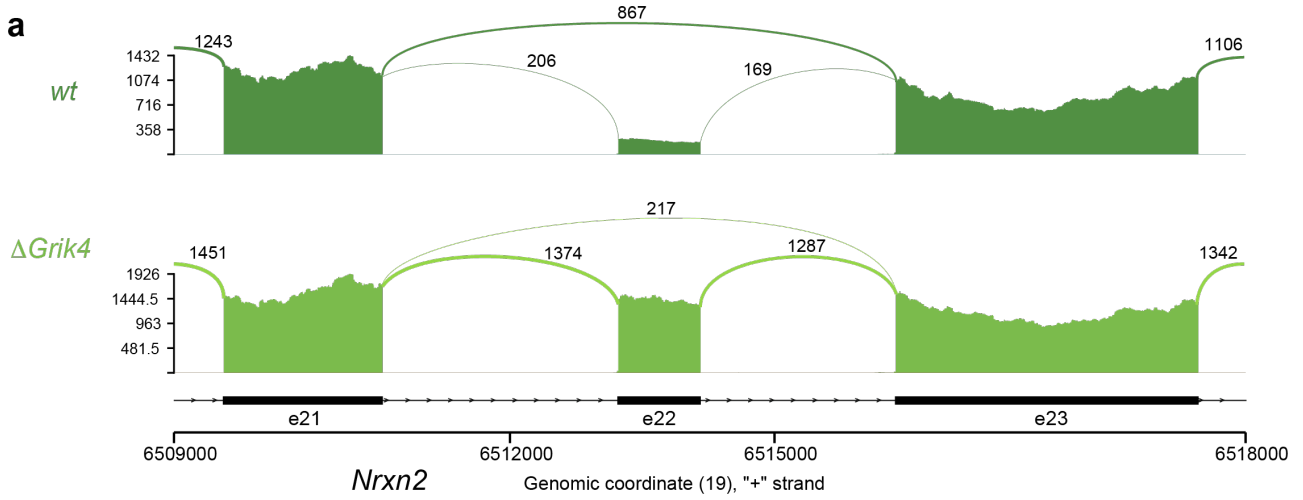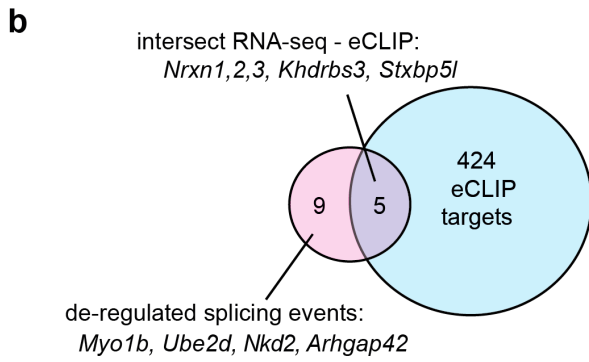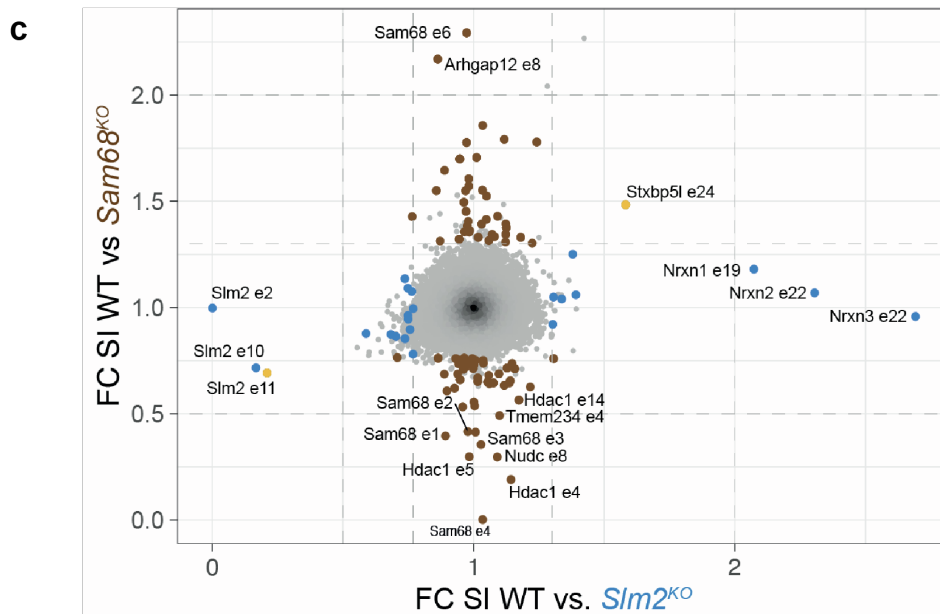

**Figure S4. Alternative splice targets in *Slm2* conditional knock-out cells.**

**a**, Representative sashimi plots illustrating read distribution and splice junctions on the *Nrxn2* gene at AS4 for *wt* and  $\Delta$ *Grik4* conditional mutant. Genomic coordinates and exon numbers are indicated below. Junction reads for exon-exon boundaries are noted and illustrated by line thickness. **b**, Venn diagram demonstrating the number of genes identified by eCLIP/IDR as bound (424), differentially alternatively spliced in *Slm2*<sup>KO</sup> (9) or both bound and alternatively spliced (5). **c**, Correlation plot of the splicing index fold change (FC SI) in mouse hippocampus between WT and *Slm2* global knock-out (*Slm2*<sup>KO 2</sup>) and WT and *Sam68* global knock-out (*Sam68*<sup>KO 3</sup>) for all detected exons (grey). Significantly differentially regulated exons (FC  $\pm$  30%, p-value 0.01) are marked in brown for *Sam68* and blue for *Slm2* mutants. Two exons, marked in yellow, are commonly de-regulated suggesting very little overlap in splicing regulation by SAM68 and SLM2 proteins.

Figure S5

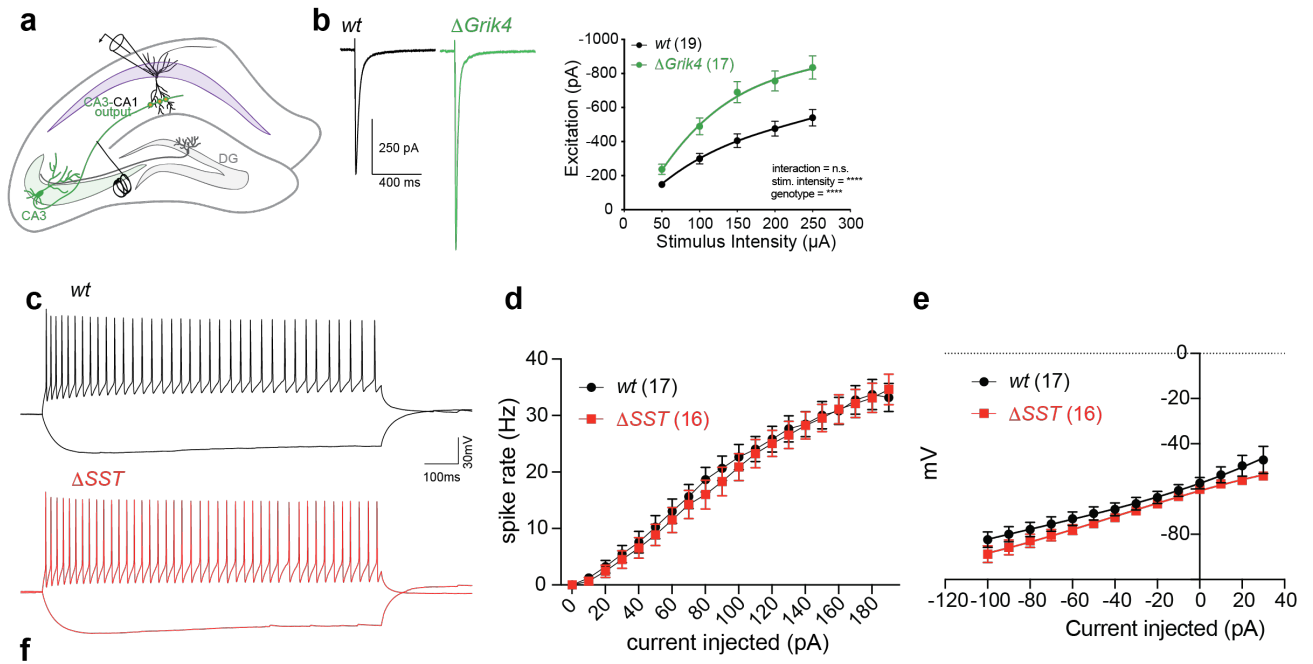

|                   | WT                 | $Slim2^{ASST}$     | p-value | n (cells) |
|-------------------|--------------------|--------------------|---------|-----------|
| IR (M $\Omega$ )  | 622.9 $\pm$ 52.92  | 603.0 $\pm$ 46.64  | 0.7778  | 28 / 32   |
| Capacitance (pF)  | 95.07 $\pm$ 7.498  | 101.0 $\pm$ 5.103  | 0.1116  | 28 / 32   |
| RMP (mV)          | -59.29 $\pm$ 1.964 | -61.04 $\pm$ 1.250 | 0.4616  | 14 / 15   |
| AP threshold (mV) | -38.31 $\pm$ 1.297 | -38.57 $\pm$ 1.581 | 0.9027  | 14 / 15   |
| AP amplitude (mV) | 90.53 $\pm$ 3.277  | 93.41 $\pm$ 2.809  | 0.7130  | 14 / 15   |
| AP Latency (ms)   | 83.86 $\pm$ 7.289  | 84.05 $\pm$ 5.358  | 0.4864  | 15 / 15   |
| AP slope rise     | 283.9 $\pm$ 18.11  | 276.6 $\pm$ 14.64  | 0.4363  | 15 / 15   |
| AP slope decay    | 116.0 $\pm$ 9.199  | 109.9 $\pm$ 6.326  | 0.2496  | 15 / 15   |
| Rheobase (pA)     | 35.76 $\pm$ 7.923  | 42.27 $\pm$ 5.828  | 0.1612  | 17 / 15   |
| Sag (mV)          | -8.903 $\pm$ 1.817 | -8.617 $\pm$ 1.084 | 0.8934  | 18 / 15   |

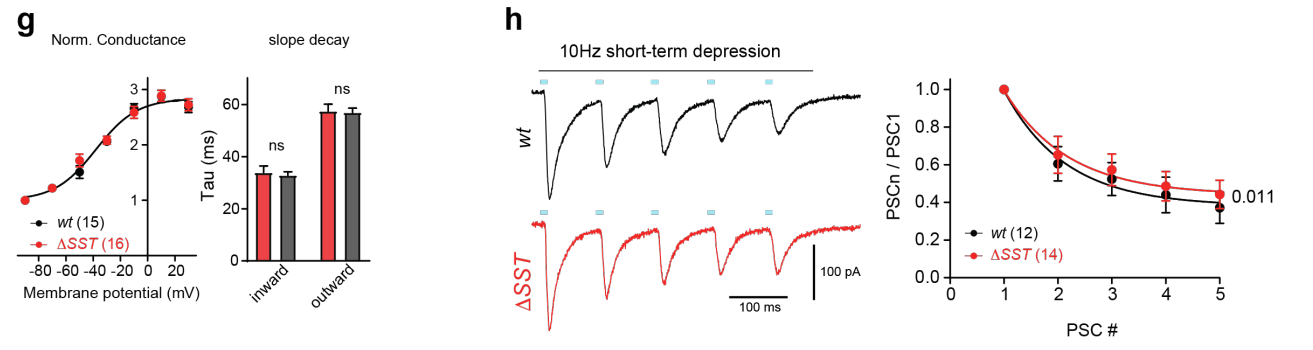

**Figure S5. Electrophysiological analysis of *Slm2* conditional knock-out cells.**

**a**, Experimental design for electrical stimulation of Schaffer collaterals and voltage clamp recordings in CA1 pyramidal cells in *wt* and  $\Delta Grik4$  mutants. **b**, Representative traces of post-synaptic EPSCs in *wt* (black) and  $\Delta Grik4$  mutants (green). Electrically evoked EPSCs with various stimulation intensities in *wt* (n=19) and  $\Delta Grik4$  mutants (n=17). Mean SD is displayed, two-way ANOVA was used for statistical analysis. **c**, Representative current clamp recordings to measure spike frequency of *wt* (black) and  $\Delta SST$  (red) SST+ interneurons in s.o. Responses to a single 1s long -100pA or +150pA current injection. **d**, Frequency of action potential firing in response to increasing current injections. *wt* n= 17,  $\Delta SST$  n=16 **e**, Analysis of changes in membrane potentials with increasing current in pA. The resting membrane potential is displayed at 0pA injection. *wt* n= 17,  $\Delta SST$  n=16 **f**, Summary table of intrinsic electrophysiological properties of *wt* and  $\Delta SST$  neurons. Mean  $\pm$  SEM, p-values were determined by the corresponding t-tests based on assessment of normality distribution and standard deviation (see methods for details). **g**, left, a plot of normalized conductance versus membrane potential shows a clear voltage-dependence *wt* and  $\Delta SST$  mutants. There was no genotype-dependent difference (p=0.60, Extra sum-of-squares F test). Right, analysis of decay times, weighted tau in milliseconds, of inward (at -90mV) and outward (at -10mV) currents showed no difference between genotypes (*wt* n=16 and  $\Delta SST$  n=15) **h**, Example traces of IPSCs during repetitive stimulation at 10Hz, *wt* (black) and  $\Delta SST$  (red). Group data of IPSCs normalized to the first peak. Mean  $\pm$  SEM, *wt* n=14 and  $\Delta SST$  n=12, Extra sum-of-squares F test for comparison of independent fits.

Figure S6

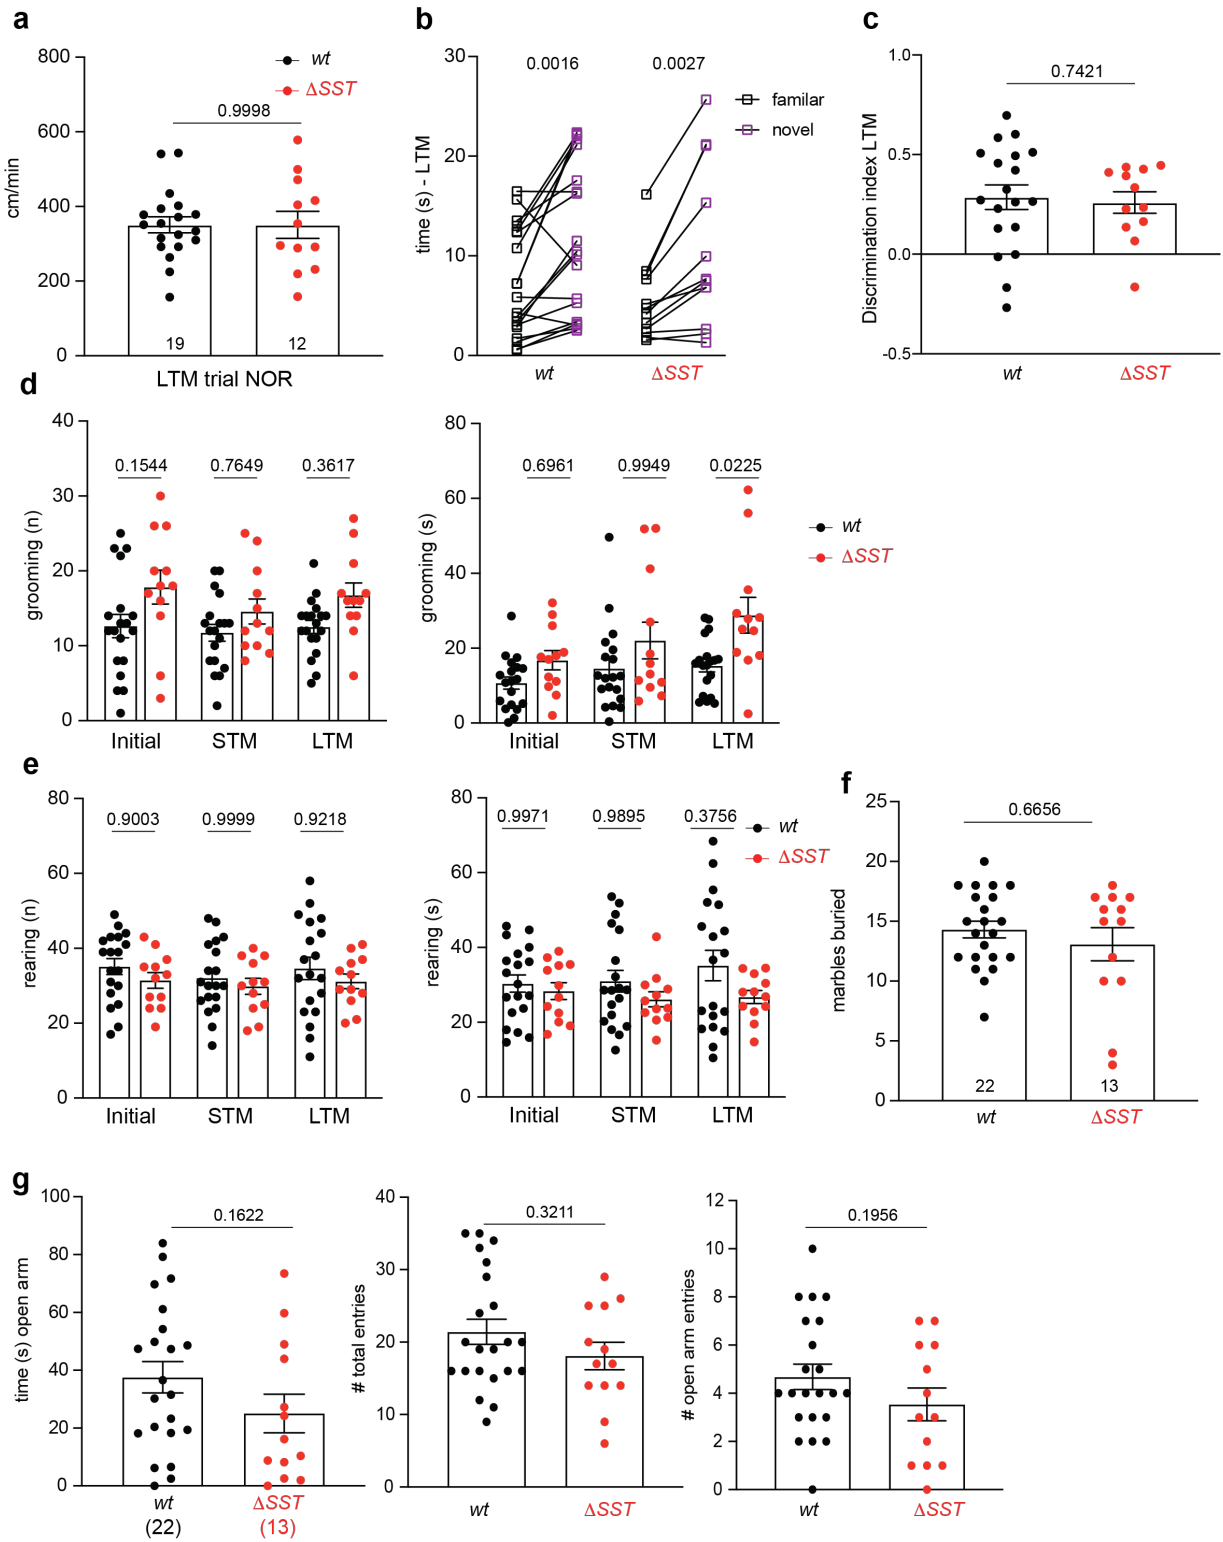

## Figure S6. Behavioral assessments in *Slm2<sup>ΔSST</sup>* mice

**a**, Quantification of velocity (cm/min) of mice during the long-term memory (LTM) test phases of the novel object recognition (NOR) task. Animal numbers for each task are indicated, Mean  $\pm$  SEM, Unpaired t-test. **b,c**, Interaction time (in seconds) that mice spend with either a familiar (black) or novel (purple) object during a 5-min long-term memory trial (paired t-test) and discrimination index (unpaired t-test with Welch's correction) are displayed. Mean  $\pm$  SEM, *wt* n=19 and  $\Delta$ SST n=12. **d**, Quantification of the number (left) and duration (right) grooming events of mice during the Open Field and phases of the NOR task. Mean  $\pm$  SEM, One-Way ANOVA with Tukey's multiple comparisons test. **e**, Quantification of the number (left) and duration (right) rearing events of mice during the Open Field and phases of the NOR task. Mean  $\pm$  SEM, One-Way ANOVA with Tukey's multiple comparisons test. **f**, Number of marbles buried when mice are placed in a novel homecage including 20 black marbles for 30min. Mean  $\pm$  SEM, Mann Whitney t-test. *wt* n=22 and  $\Delta$ SST n=13. **g**, Analysis of the amount of time mice spend in an open arm of the elevated plus maze during a 5min trial (left), their number of entries into either the open or closed arm (middle) and number of entries into the open arm (right). Mean  $\pm$  SEM, unpaired t-test. *wt* n=22 and  $\Delta$ SST n=13.

## References Cited in Supplement

1. Furlanis, E., Traunmuller, L., Fucile, G., and Scheiffele, P. (2019). Landscape of ribosome-engaged transcript isoforms reveals extensive neuronal-cell-class-specific alternative splicing programs. *Nature neuroscience* 22, 1709-1717. 10.1038/s41593-019-0465-5.
2. Traunmüller, L., Gomez, A.M., Nguyen, T.-M., and Scheiffele, P. (2016). Control of neuronal synapse specification by highly dedicated alternative splicing program. *Science (New York, N.Y)* 352, 982-986.
3. Witte, H., Schreiner, D., and Scheiffele, P. (2019). A Sam68-dependent alternative splicing program shapes postsynaptic protein complexes. *Eur J Neurosci* 49, 1436-1453. 10.1111/ejn.14332.
